# Supplementary material for: Interpregnancy Interval and Subsequent Severe Maternal Morbidity: A 16-Year Population-Based Study From California
Source: PubMed Central journal article supplement (PMC8168254; doi:10.1093/aje/kwab020), 2021-02-05
Supplement: web_material_kwab020.pdf [file web_material_kwab020.pdf]

# Interpregnancy Interval and Subsequent Severe Maternal Morbidity: A 16-Year Population-Based Study From California

Can Liu, Jonathan M Snowden, Deirdre J. Lyell, Elizabeth Wall-Wieler, Barbara Abrams, Peiyi Kan, Olof Stephansson, Audrey Lyndon, and Suzan L. Carmichael

Web Tables 1 – 4

Web Figures 1 and 2

Web Table 1. SMM and Bateman comorbidity Indicators and their corresponding International Classification of Diseases, Ninth Revision

|                                                  | Diagnosis (DX) or Procedure (PR) | International Classification of Diseases, Ninth Revision                      | Weights |
|--------------------------------------------------|----------------------------------|-------------------------------------------------------------------------------|---------|
| Infertility                                      | DX                               | 628.xx                                                                        | N/A     |
| SMM Indicator                                    |                                  |                                                                               |         |
| Acute myocardial infarction                      | DX                               | 410.xx                                                                        | N/A     |
| Aneurysm                                         | DX                               | 441.xx                                                                        |         |
| Acute renal failure                              | DX                               | 584.5, 584.6, 584.7, 584.8, 584.9, 669.3x                                     |         |
| Adult respiratory distress syndrome              | DX                               | 518.5x, 518.81 518.82 518.84, 799.1                                           |         |
| Amniotic fluid embolism                          | DX                               | 673.1x                                                                        |         |
| Cardiac arrest/ventricular fibrillation          | DX                               | 427.41, 427.42, 427.5                                                         |         |
| Conversion of cardiac rhythm                     | PR                               | 99.6x                                                                         |         |
| Disseminated intravascular coagulation           | DX                               | 286.6, 286.9, 666.3x                                                          |         |
| Eclampsia                                        | DX                               | 642.6x                                                                        |         |
| Heart failure/arrest during surgery or procedure | DX                               | 997.1x                                                                        |         |
| Puerperal cerebrovascular disorders              | DX                               | 430.xx, 431.xx, 432.xx, 433.xx, 434.xx, 436xx, 437.xx, 671.5x, 674.0x, 997.02 |         |
| Pulmonary edema / Acute heart failure            | DX                               | 518.4, 428.1, 428.0, 428.21, 428.23, 428.31, 428.33, 428.41, 428.43           |         |
| Severe anesthesia complications                  | DX                               | 668.0x, 668.1x, 668.2x                                                        |         |
| Sepsis                                           | DX                               | 038.xx, 995.91, 995.92, 670.2x                                                |         |
| Shock                                            | DX                               | 669.1x, 785.5x, 995.0, 995.4, 998.0x                                          |         |
| Sickle cell disease with crisis                  | DX                               | 282.42, 282.62, 282.64, 282.69                                                |         |
| Air and thrombotic embolism                      | DX                               | 415.1x, 673.0x, 673.2x, 673.3x, 673.8x                                        |         |
| Blood products transfusion                       | PR                               | 99.0x                                                                         |         |
| Hysterectomy                                     | PR                               | 68.3x-68.9x                                                                   |         |
| Temporary tracheostomy                           | PR                               | 31.1                                                                          |         |
| Ventilation                                      | PR                               | 93.90, 96.01, 96.02, 96.03, 96.05                                             |         |
| Bateman comorbidity indicator                    |                                  |                                                                               |         |

|                                                               |    |                                                                                |   |
|---------------------------------------------------------------|----|--------------------------------------------------------------------------------|---|
| Severe preeclampsia (excluding eclampsia)                     | DX | 642.5x                                                                         | 5 |
| Chronic congestive heart failure                              | DX | 428.22, 428.23, 428.32, 428.33, 428.42, 428.43                                 | 5 |
| Congenital heart disease                                      | DX | 745.xx, 746, 747.0x, 747.1x, 747.2x, 747.3x, 747.4x, 648.5x                    | 4 |
| Pulmonary hypertension                                        | DX | 416.0x, 416.8x, 416.9x                                                         | 4 |
| Chronic ischemic heart disease                                | DX | 412.xx, 413.xx, 414.xx                                                         | 3 |
| Sickle cell disease (exclude sickle cell disease with crisis) | DX | 282.4x, 282.6x (exclude 282.42, 282.62, 282.64, 282.69)                        | 3 |
| Multiple gestation <sup>a</sup>                               |    |                                                                                | 2 |
| Cardiac valvular disease                                      | DX | 394.xx, 395.xx, 396.xx, 397.xx                                                 | 2 |
| Systemic lupus erythematosus                                  | DX | 710.0x                                                                         | 2 |
| Human immunodeficiency virus                                  | DX | 042.xx, V08.x                                                                  | 2 |
| Mild or unspecified preeclampsia <sup>b</sup>                 | DX | 642.4x, 642.7x                                                                 | 2 |
| Drug abuse                                                    | DX | 304.xx, 305.2x, 305.3x, 305.4x, 305.5x, 305.6x, 305.7x, 305.8x, 305.9x, 648.3x | 2 |
| Placenta previa                                               | DX | 641.0x, 641.1x                                                                 | 2 |
| Chronic renal disease <sup>a</sup>                            | DX | 581.xx, 582.xx, 583.xx, 585.xx, 587.xx, 588.xx, 646.2x                         | 1 |
| Pre-existing hypertension <sup>a</sup>                        | DX | 401.xx, 402.xx, 403.xx, 404.xx, 405.xx, 642.0x, 642.1x, 642.2x, 642.7x         | 1 |
| Previous cesarean delivery                                    | DX | 654.2x                                                                         | 1 |
| Gestational hypertension <sup>c</sup>                         | DX | 642.3x                                                                         | 1 |
| Alcohol abuse                                                 | DX | 291.xx, 303.xx, 305.0x                                                         | 1 |
| Asthma <sup>a</sup>                                           | DX | 493.xx                                                                         | 1 |
| Pre-existing diabetes mellitus <sup>a</sup>                   | DX | 250.xx, 648.0x                                                                 | 1 |
| Maternal age, years                                           |    |                                                                                |   |
| >44                                                           |    |                                                                                | 3 |
| 40-44                                                         |    |                                                                                | 2 |
| 35-39                                                         |    |                                                                                | 1 |

<sup>a</sup> Assessed additionally based on vital record.

<sup>b</sup> Received a weight for mild or unspecified preeclampsia only if they did not have severe preeclampsia/eclampsia present.

<sup>c</sup> Received a weight for gestational hypertension only if they did not have preexisting hypertension or preeclampsia/eclampsia present.

SMM: severe maternal morbidity.

Web Table 2. Characteristics of women who gave birth at least twice in California from 1997-2012, based on information from the index pregnancy, overall and by IPI

|                                                | Total     | IPI       |             |              |              |              |             |
|------------------------------------------------|-----------|-----------|-------------|--------------|--------------|--------------|-------------|
|                                                |           | <6 months | 6-11 months | 12-17 months | 18-23 months | 24-59 months | >=60 months |
|                                                | 2,203,517 | 148,560   | 302,895     | 349,641      | 294,696      | 820,246      | 287,479     |
|                                                | %         | %         | %           | %            | %            | %            | %           |
| Overall (row percentages)                      | 100.0     | 6.7       | 13.7        | 15.9         | 13.4         | 37.2         | 13.0        |
| Maternal age                                   |           |           |             |              |              |              |             |
| < 20                                           | 14.1      | 17.5      | 12.5        | 10.9         | 11.1         | 14.3         | 20.2        |
| 20-24                                          | 28.1      | 33.2      | 26.4        | 23.4         | 23.5         | 28.3         | 37.0        |
| 25-29                                          | 28.4      | 25.7      | 27.9        | 28.8         | 29.3         | 28.7         | 27.7        |
| 30-34                                          | 21.6      | 16.2      | 22.7        | 26.0         | 26.2         | 21.8         | 12.9        |
| 35-39                                          | 7.2       | 6.6       | 9.5         | 9.9          | 9.2          | 6.5          | 2.1         |
| 40 +                                           | 0.7       | 0.8       | 1.1         | 1.0          | 0.8          | 0.5          | 0.1         |
| Parity                                         |           |           |             |              |              |              |             |
| 1                                              | 54.6      | 45.5      | 53.1        | 58.0         | 59.3         | 55.7         | 49.0        |
| 2                                              | 26.5      | 27.1      | 25.3        | 23.8         | 23.9         | 27.0         | 31.9        |
| 3                                              | 11.2      | 14.4      | 12.1        | 10.7         | 10.0         | 10.6         | 12.4        |
| 4 or more                                      | 7.7       | 13.0      | 9.6         | 7.6          | 6.9          | 6.6          | 6.7         |
| Gestational age                                |           |           |             |              |              |              |             |
| Extremely Preterm,20-27 w                      | 0.8       | 2.4       | 1.1         | 0.7          | 0.6          | 0.6          | 0.6         |
| Very Preterm,28-31 w                           | 0.8       | 1.4       | 0.9         | 0.7          | 0.7          | 0.8          | 0.9         |
| Preterm,32-36 w                                | 7.8       | 9.6       | 7.8         | 7.2          | 7.1          | 7.6          | 8.4         |
| Term,37-40 w                                   | 73.2      | 72.4      | 74.7        | 74.8         | 74.5         | 73.0         | 69.2        |
| Post-Term,41-45 w                              | 17.5      | 14.2      | 15.6        | 16.7         | 17.1         | 18.1         | 20.9        |
| Cesarean                                       |           |           |             |              |              |              |             |
| No                                             | 76.2      | 77.6      | 75.9        | 75.7         | 75.5         | 75.7         | 79.0        |
| Yes                                            | 23.8      | 22.4      | 24.2        | 24.3         | 24.5         | 24.3         | 21.1        |
| Stillbirth or neonatal death                   |           |           |             |              |              |              |             |
| No                                             | 99.0      | 95.9      | 98.3        | 99.1         | 99.3         | 99.5         | 99.6        |
| Yes                                            | 1.0       | 4.1       | 1.8         | 0.9          | 0.7          | 0.5          | 0.4         |
| Maternal education                             |           |           |             |              |              |              |             |
| Less than high school                          | 21.9      | 30.4      | 21.4        | 18.0         | 17.7         | 21.7         | 28.1        |
| High school graduate                           | 30.1      | 35.3      | 29.2        | 26.0         | 25.9         | 30.0         | 37.8        |
| Some college                                   | 22.4      | 21.8      | 23.3        | 22.4         | 22.1         | 22.4         | 22.2        |
| Undergraduate degree                           | 14.9      | 8.2       | 15.7        | 19.3         | 19.7         | 14.9         | 7.1         |
| Postgraduate degree                            | 10.7      | 4.4       | 10.4        | 14.4         | 14.7         | 11.1         | 4.8         |
| Maternal race/ethnicity                        |           |           |             |              |              |              |             |
| Non-Hispanic White                             | 35.8      | 26.1      | 36.8        | 42.3         | 42.7         | 35.2         | 26.2        |
| Non-Hispanic Black                             | 7.2       | 9.5       | 7.3         | 5.9          | 5.9          | 7.0          | 9.3         |
| Non-Hispanic Asian                             | 12.3      | 10.7      | 12.4        | 13.0         | 12.9         | 12.7         | 10.2        |
| Non-Hispanic Pacific Islander                  | 0.7       | 1.3       | 0.9         | 0.7          | 0.6          | 0.6          | 0.6         |
| Hispanic                                       | 43.4      | 51.5      | 41.8        | 37.5         | 37.3         | 43.9         | 53.1        |
| Non-Hispanic American Indian and Alaska Native | 0.6       | 0.9       | 0.7         | 0.6          | 0.5          | 0.5          | 0.6         |
| Non-Latina Other                               | 0.1       | 0.1       | 0.1         | 0.1          | 0.1          | 0.1          | 0.1         |
| Nativity                                       |           |           |             |              |              |              |             |
| Foreign born                                   | 29.4      | 27.0      | 28.5        | 27.9         | 27.6         | 30.5         | 32.2        |
| US born                                        | 70.6      | 73.0      | 71.5        | 72.1         | 72.4         | 69.5         | 67.8        |
| Principal source of payment for delivery       |           |           |             |              |              |              |             |
| Private                                        | 57.8      | 41.6      | 56.9        | 63.9         | 64.9         | 58.8         | 49.6        |
| Public/Government                              | 40.1      | 55.6      | 40.7        | 34.0         | 33.1         | 39.1         | 48.5        |
| Uninsured/Other                                | 2.2       | 2.9       | 2.4         | 2.1          | 2.1          | 2.1          | 1.9         |
| SMM                                            |           |           |             |              |              |              |             |
| No                                             | 99.2      | 98.9      | 99.1        | 99.2         | 99.2         | 99.2         | 99.3        |
| Yes                                            | 0.8       | 1.1       | 0.9         | 0.8          | 0.8          | 0.8          | 0.7         |

|                                  |             |      |      |      |      |      |      |      |
|----------------------------------|-------------|------|------|------|------|------|------|------|
| Co-morbidity score <sup>a</sup>  |             |      |      |      |      |      |      |      |
|                                  | 0           | 74.7 | 72.8 | 71.9 | 72.9 | 73.7 | 75.5 | 79.3 |
|                                  | 1           | 16.7 | 16.7 | 18.4 | 18.1 | 17.7 | 16.3 | 13.5 |
|                                  | 2           | 5.9  | 6.9  | 6.6  | 6.1  | 5.9  | 5.6  | 5.0  |
|                                  | 3 or higher | 2.7  | 3.6  | 3.2  | 2.9  | 2.7  | 2.6  | 2.2  |
| Infertility <sup>b</sup>         |             |      |      |      |      |      |      |      |
|                                  | No          | 99.7 | 99.8 | 99.7 | 99.6 | 99.6 | 99.7 | 99.7 |
|                                  | Yes         | 0.3  | 0.2  | 0.3  | 0.4  | 0.4  | 0.4  | 0.4  |
| Calendar year of index pregnancy |             |      |      |      |      |      |      |      |
|                                  | 1997-1999   | 24.8 | 19.4 | 19.8 | 20.4 | 21.5 | 24.9 | 41.3 |
|                                  | 2000-2004   | 38.8 | 30.3 | 32.6 | 34.7 | 36.5 | 41.2 | 50.2 |
|                                  | 2005-2009   | 32.5 | 37.4 | 37.4 | 37.7 | 38.2 | 33.8 | 8.5  |
|                                  | 2010 -2012  | 4.0  | 12.9 | 10.2 | 7.3  | 3.8  | 0.2  | 0.0  |

<sup>a</sup> Co-morbidity score was calculated based on the Bateman index,(28) but excluding eclampsia and sickle cell disease to avoid duplicate with SMM index.(10)

<sup>b</sup> Infertility was assessed based on vital record of either the index or the subsequent pregnancy.

SMM: severe maternal morbidity.

Web Table 3. List of *P*-values for multiplicative interaction between IPI and stratifiers, California  
1997-2012

| <i>P</i> -values for multiplicative interaction between dichotomized IPI and stratifiers |                                    |                                    |
|------------------------------------------------------------------------------------------|------------------------------------|------------------------------------|
|                                                                                          | IPI <18 months vs IPI 18-23 months | IPI >23 months vs IPI 18-23 months |
| Parity 2 vs Parity 1                                                                     |                                    |                                    |
| Overall SMM                                                                              | 0.949                              | 0.274                              |
| SMM minus transfusion                                                                    | 0.718                              | 0.958                              |
| Parity 3 vs Parity 1                                                                     |                                    |                                    |
| Overall SMM                                                                              | 0.810                              | 0.313                              |
| SMM minus transfusion                                                                    | 0.639                              | 0.607                              |
| Maternal age <20 vs<br>Maternal age 20-34                                                |                                    |                                    |
| Overall SMM                                                                              | 0.240                              | 0.091                              |
| SMM minus transfusion                                                                    | 0.217                              | 0.158                              |
| Maternal age ≥35 vs<br>Maternal age 20-34                                                |                                    |                                    |
| Overall SMM                                                                              | 0.986                              | 0.437                              |
| SMM minus transfusion                                                                    | 0.928                              | 0.697                              |

Web Table 4. Adjusted risk ratios of the association between IPI and SMM in California from 1997-2012, using primiparous pregnancies as reference

|                           | Primiparous                |           | IPI                    |            |                        |            |                        |            |                        |            |                        |            |                        |            |
|---------------------------|----------------------------|-----------|------------------------|------------|------------------------|------------|------------------------|------------|------------------------|------------|------------------------|------------|------------------------|------------|
|                           |                            |           | <6 months              |            | 6-11 months            |            | 12-17 months           |            | 18-23 months           |            | 24-59 months           |            | ≥60 months             |            |
|                           | RR                         | 95% CI    | RR                     | 95% CI     | RR                     | 95% CI     | RR                     | 95% CI     | RR                     | 95% CI     | RR                     | 95% CI     | RR                     | 95% CI     |
| Overall SMM               | 36,628/2,974,959<br>(1.23) |           | 1813/148,677<br>(1.22) |            | 3075/302,778<br>(1.02) |            | 3279/349,349<br>(0.94) |            | 2921/293,847<br>(0.99) |            | 9280/815,997<br>(1.14) |            | 4398/283,978<br>(1.55) |            |
| Unadjusted                | 1.00                       | Reference | 0.99                   | 0.95, 1.04 | 0.82                   | 0.80, 0.86 | 0.76                   | 0.74, 0.79 | 0.81                   | 0.78, 0.84 | 0.92                   | 0.90, 0.94 | 1.26                   | 1.22, 1.30 |
| Adjusted                  | 1.00                       | Reference | 0.85                   | 0.81, 0.89 | 0.73                   | 0.70, 0.75 | 0.68                   | 0.65, 0.70 | 0.70                   | 0.68, 0.73 | 0.74                   | 0.72, 0.76 | 0.80                   | 0.77, 0.83 |
| SMM excluding transfusion | 18,495/2,956,826<br>(0.63) |           | 684/147,548<br>(0.46)  |            | 1424/301,127<br>(0.47) |            | 1529/347,599<br>(0.44) |            | 1424/292,350<br>(0.49) |            | 4780/811,497<br>(0.59) |            | 2295/281,875<br>(0.81) |            |
| Unadjusted                | 1.00                       | Reference | 0.74                   | 0.69, 0.80 | 0.76                   | 0.72, 0.80 | 0.70                   | 0.67, 0.74 | 0.78                   | 0.74, 0.82 | 0.94                   | 0.91, 0.97 | 1.30                   | 1.25, 1.36 |
| Adjusted                  | 1.00                       | Reference | 0.64                   | 0.59, 0.69 | 0.65                   | 0.61, 0.68 | 0.60                   | 0.57, 0.64 | 0.65                   | 0.62, 0.69 | 0.74                   | 0.71, 0.76 | 0.82                   | 0.78, 0.86 |

Primiparous pregnancies: analysis for overall SMM N= 2,974,959; analysis for SMM excluding transfusion N=2,956,826, i.e. excluding 18,133 transfusion-only SMM cases from the primiparous population.

Multiparous pregnancies: analysis for overall SMM N= 2,194,626; analysis for SMM excluding transfusion N=2,181,996, i.e. excluding 12,630 transfusion-only SMM cases from the multiparous population.

Adjusted for year of birth, maternal age, maternal education, maternal race/ethnicity, nativity, principal source of payment for birth (For multiparous pregnancies: measured at the subsequent pregnancy to be comparable to the primiparous pregnancy).

SMM: severe maternal morbidity; IPI: Interpregnancy interval.



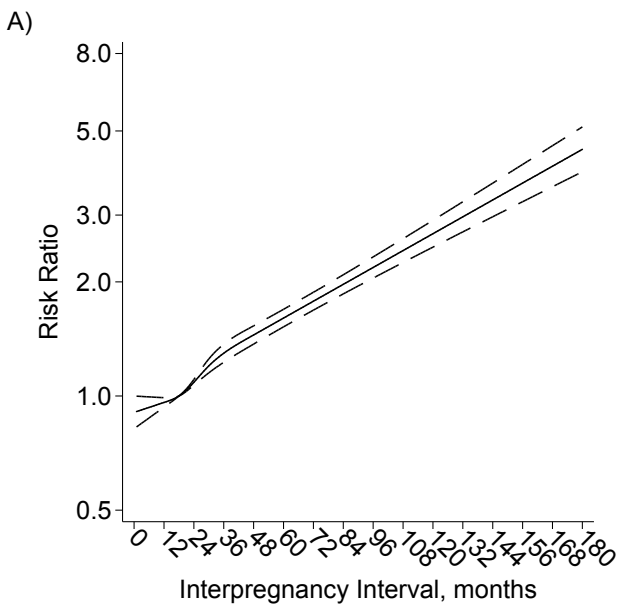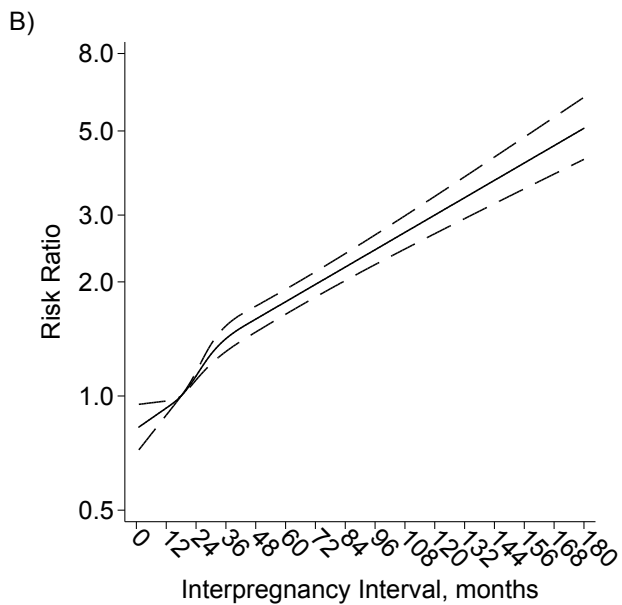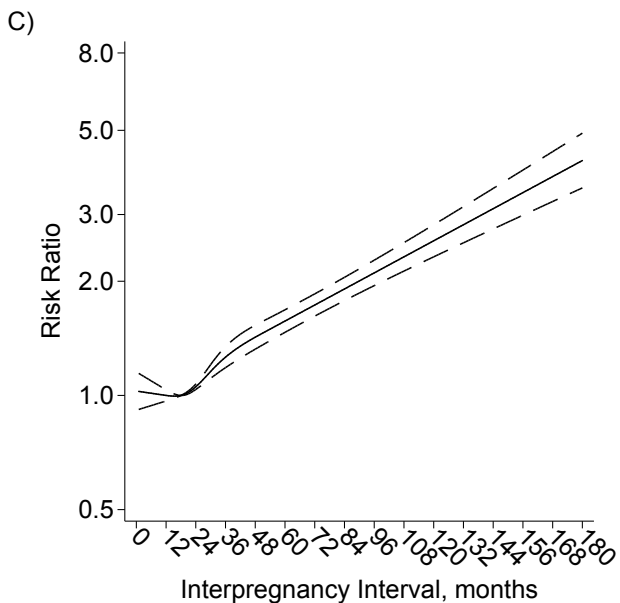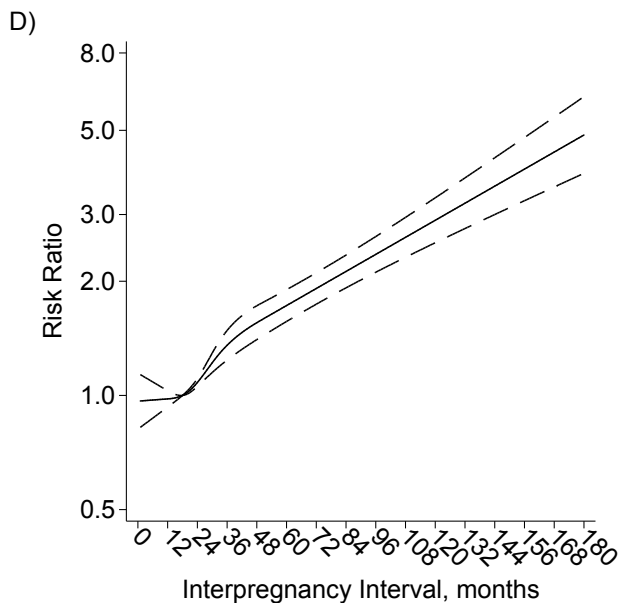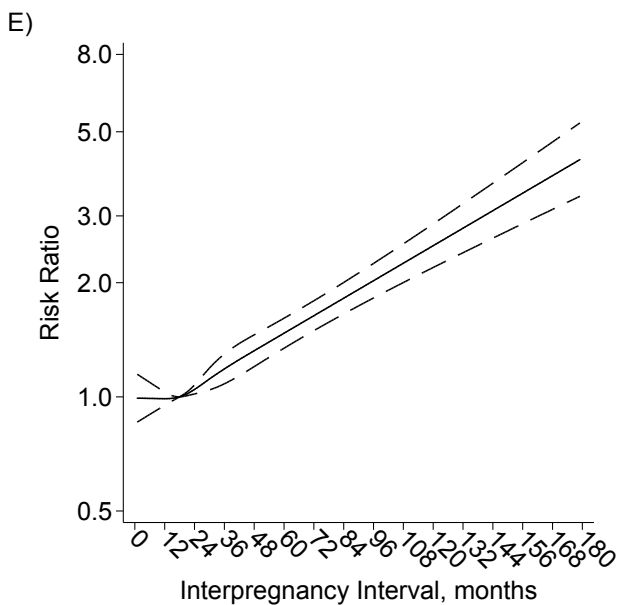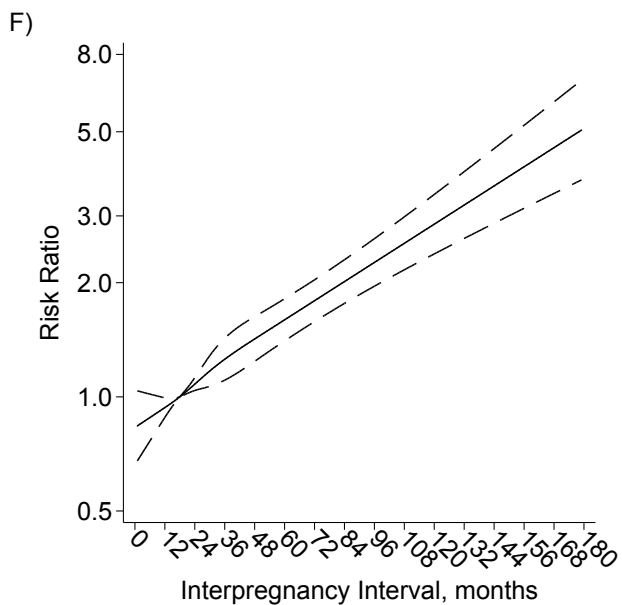

Web Figure 1. Risk ratio of SMM (including (left) and excluding (right) transfusion) by IPI modelled with restricted cubic splines (reference=18 months IPI) stratified by parity of the index pregnancy, California 1997-2012. IPI: Interpregnancy interval; SMM: severe maternal morbidity. Adjusted for gestational age, cesarean section maternal age, maternal education, maternal race, ancestry, principal source of payment for delivery, calendar year of the index pregnancy, stillbirth, SMM, Bateman score, any indication of infertility in the previous or the index pregnancy. Panel A and B are parity 1 (IPI from first to second pregnancy). Panel C and D are parity 2 (IPI from second to third pregnancy). Panel E and F are parity 3 (IPI from third to fourth pregnancy). Panel A, C, E are on overall SMM. Panel B, D and F are on SMM excluding transfusion only cases. The solid lines are the smoothed point estimation of the risk ratios. The dashed lines are the lower and upper bound of the 95% CI of the risk ratios.

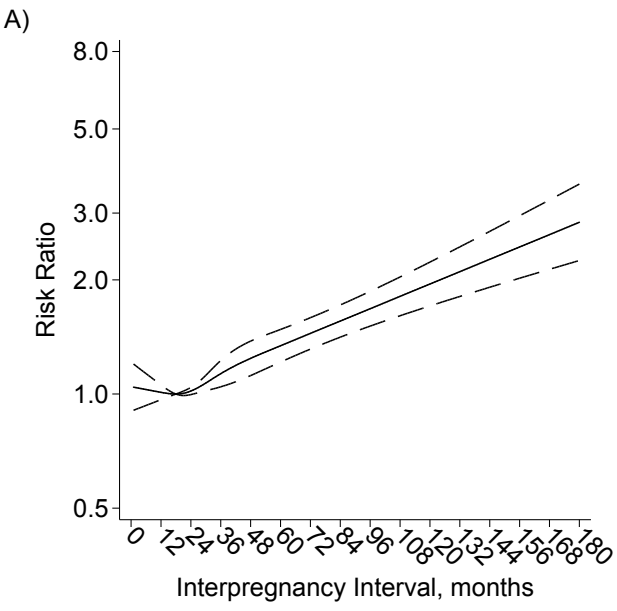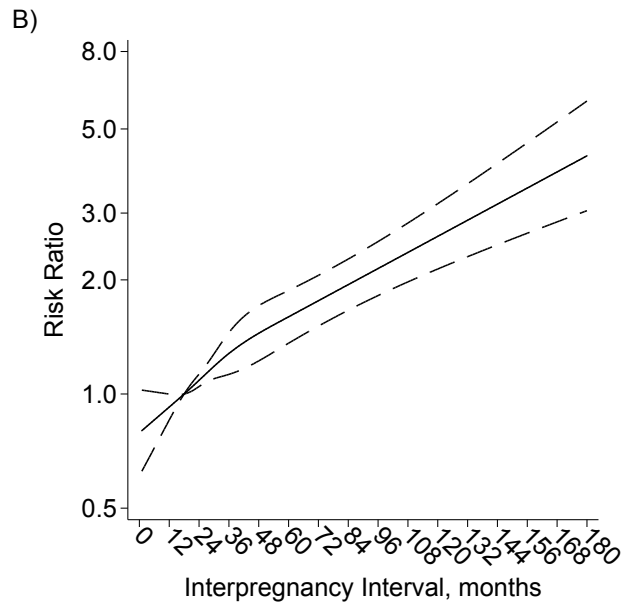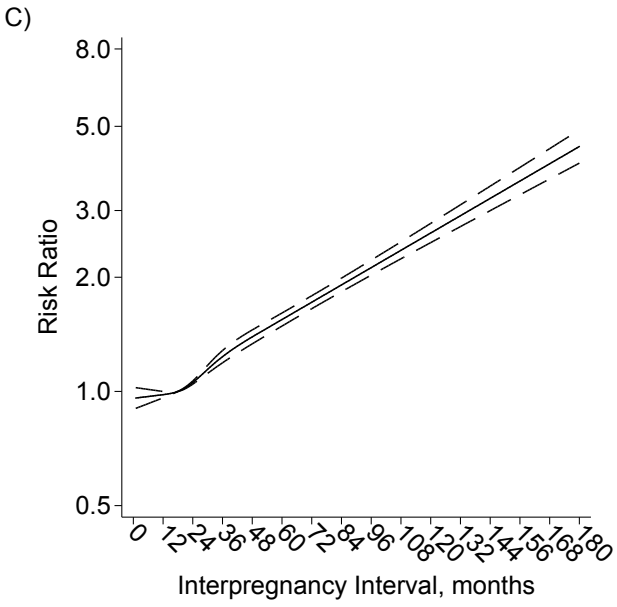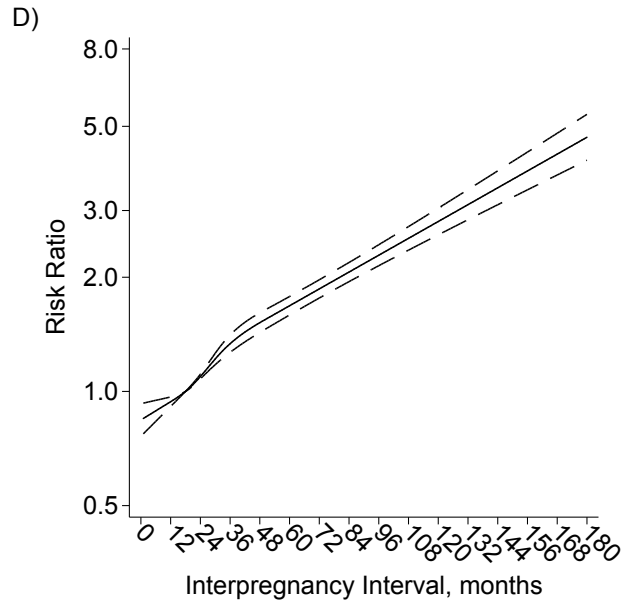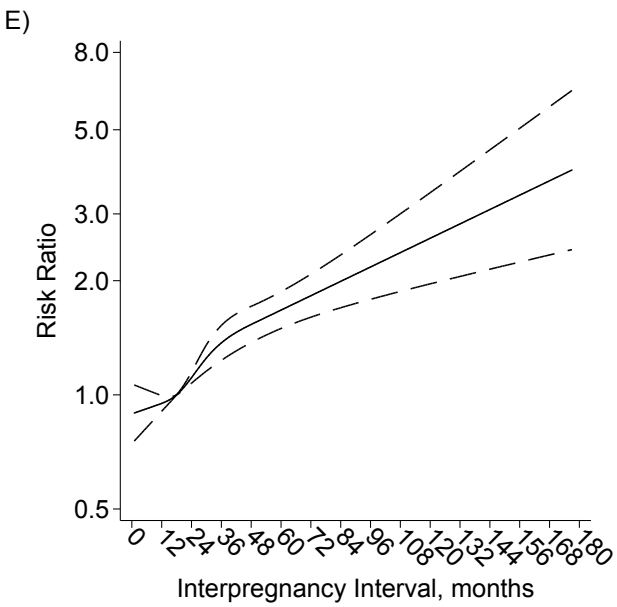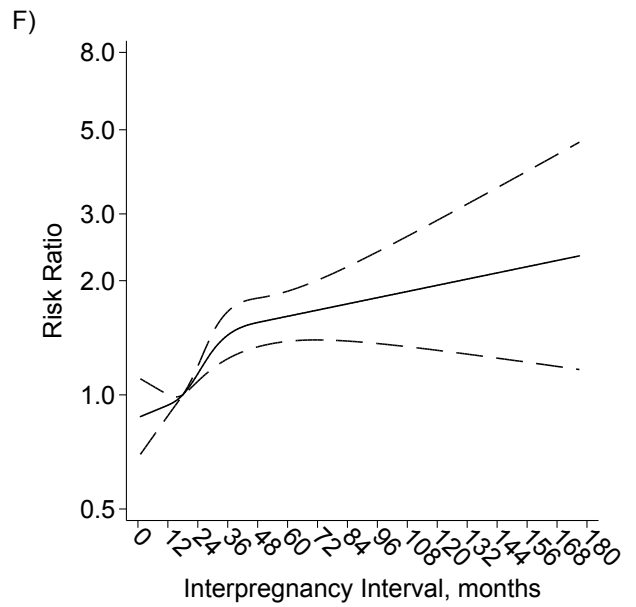

Web Figure 2. Risk ratio of SMM (including (left) and excluding (right) transfusion) by IPI modelled with restricted cubic splines (reference=18 months IPI) stratified by maternal age at the index pregnancy, California 1997-2012. IPI: Interpregnancy interval; SMM: severe maternal morbidity. Adjusted for parity, gestational age, cesarean section, maternal education, maternal race, ancestry, principal source of payment for delivery, calendar year of the index pregnancy, stillbirth, SMM, Bateman score, any indication of infertility in the previous or the index pregnancy. Panel A and B are among mother aged younger than 20 years at the index pregnancy. Panel C and D are among mother aged 20-34 years at the index pregnancy. Panel E and F are among mother aged 35 or older at the index pregnancy. Panel A, C, E are on overall SMM. Panel B, D and F are on SMM excluding transfusion only cases. The solid lines are the smoothed point estimation of the risk ratios. The dashed lines are the lower and upper bound of the 95% CI of the risk ratios.
